# Supplementary material
Source: Springer Nature journal article supplement (https://www.springermedizin.de/resource/supplementary/12958_2006_305_MOESM10_ESM.pdf/9567586)

### *Spag11c*

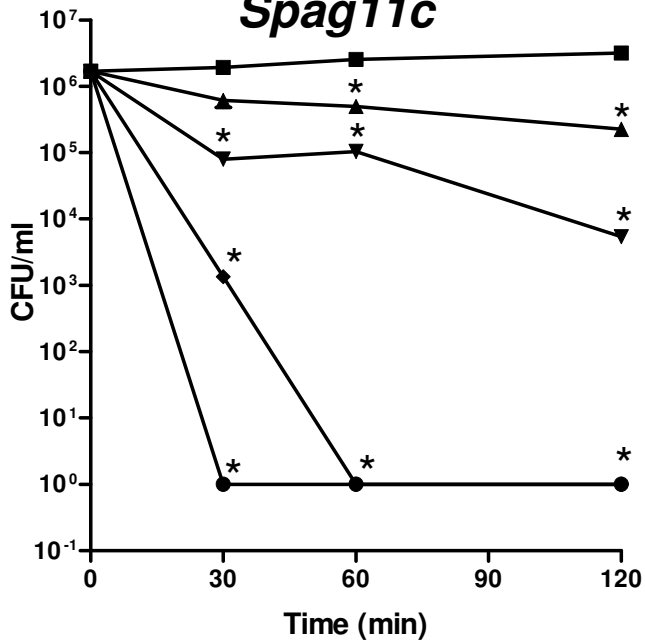

### *Spag11e*

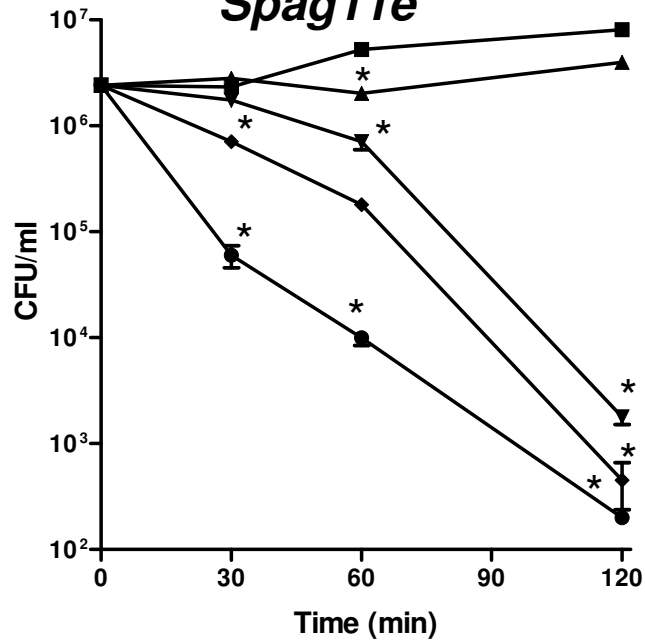

### *Spag11t*

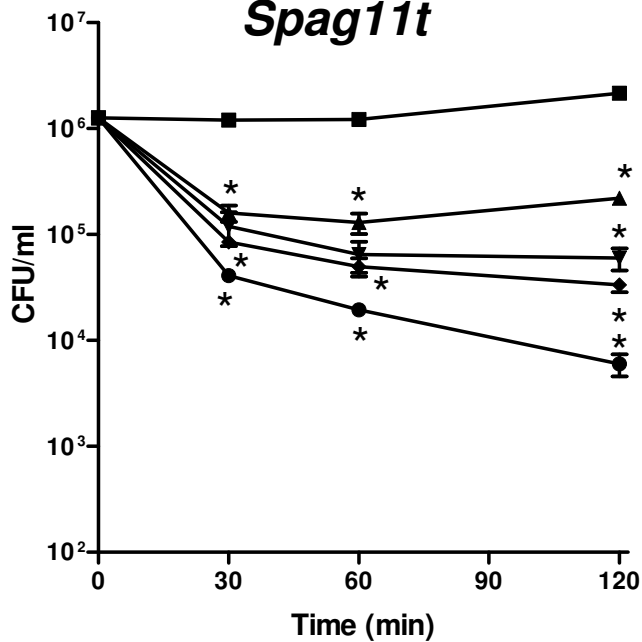

Supplement: MOESM10 [file 9567586]
